# Supplementary material for: Highly synergistic drug combination prevents vaginal HIV infection in humanized mice
Source: PubMed Central journal article supplement (PMC7400648; doi:10.1038/s41598-020-69937-5), 2020-08-03
Supplement: 41598_2020_69937_MOESM1_ESM.pdf [file 41598_2020_69937_MOESM1_ESM.pdf]

# Highly Synergistic Drug Combination Prevents Vaginal HIV Infection in Humanized Mice

Marc M. Baum<sup>1\*</sup>, Christina M. Ramirez<sup>2</sup>, John A. Moss<sup>1</sup>, Manjula Gunawardana<sup>1</sup>, Michael Bobardt<sup>3</sup>, Philippe A. Gallay<sup>3\*</sup>

<sup>1</sup>Department of Chemistry, Oak Crest Institute of Science, 128-132 W. Chestnut Ave., Monrovia, CA, USA

<sup>2</sup>University of California, Los Angeles (UCLA) Fielding School of Public Health, 650 Charles E. Young Dr. South, 16-035 Center for Health Sciences, Los Angeles, CA, USA

<sup>3</sup>Department of Immunology & Microbiology, The Scripps Research Institute, 10550 North Torrey Pines Road, La Jolla, CA, USA

\*email: [m.baum@oak-crest.org](mailto:m.baum@oak-crest.org); [gallay@scripps.edu](mailto:gallay@scripps.edu)

## **Supplementary Information**

The Supplementary Information includes the following data:

**Figure S1:** VRC01-*N* SDS-PAGE and Western blot images.

**Appendix A:** BLT mouse efficacy data from HIV vaginal challenge studies following vaginal administration of VRC01-*N*.

**Appendix B:** BLT mouse efficacy data from HIV vaginal challenge studies following vaginal administration of VRC01-*N*, TDF, FTC (broad dosing range).

**Appendix C:** BLT mouse efficacy data from HIV vaginal challenge studies following vaginal administration of VRC01-*N*, TDF, FTC (narrow dosing range).

**Appendix D:** Median-effect data used in the analysis.

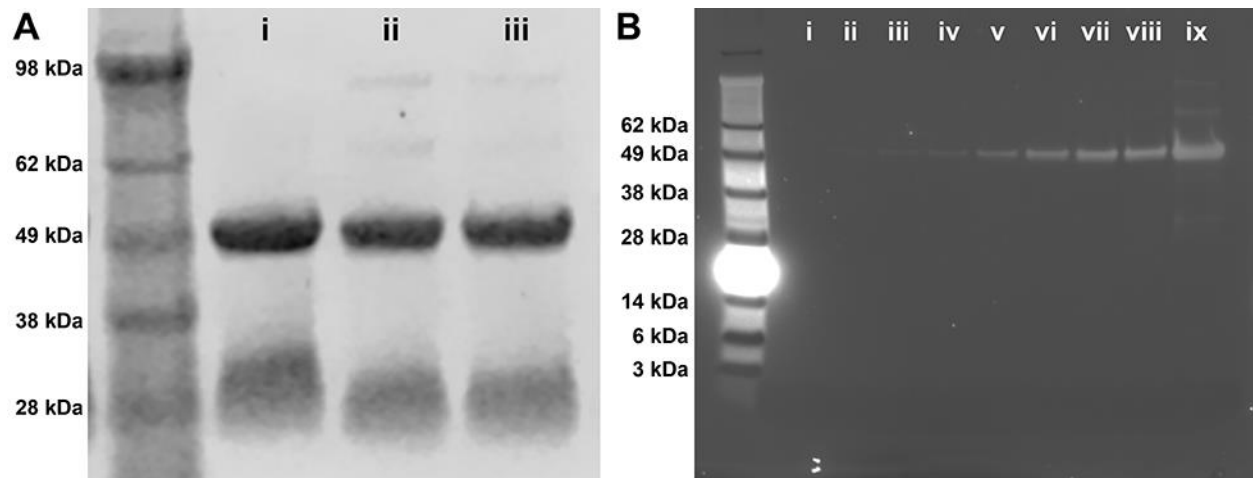

**Figure S1.** PAGE and Western blot analysis of VRC01. **A:** Coomassie-stained SDS-PAGE gel showing VRC01-*N*. **i:** NIH AIDS Reagent Program VRC01 reference material, 0.60  $\mu\text{g well}^{-1}$ ; **ii:** VRC01-*N* produced in *Nicotiana* spp. (2014), this study, 0.33  $\mu\text{g well}^{-1}$ ; **iii:** VRC01-*N* produced in *Nicotiana* spp. (2018), 0.31  $\mu\text{g well}^{-1}$ . **B:** Western blot of VRC01-*N* (this study) over a 0.01-5  $\mu\text{g well}^{-1}$  range. **i:** 0.01  $\mu\text{g}$ ; **ii:** 0.05  $\mu\text{g}$ ; **iii:** 0.075  $\mu\text{g}$ ; **iv:** 0.1  $\mu\text{g}$ ; **v:** 0.25  $\mu\text{g}$ ; **vi:** 0.5  $\mu\text{g}$ ; **vii:** 0.75  $\mu\text{g}$ ; **viii:** 1.0  $\mu\text{g}$ ; **ix:** 5.0  $\mu\text{g}$ .

**Appendix A: BLT mouse efficacy data from HIV vaginal challenge studies following vaginal administration of VRC01-N.**

| Mice | Human CD45+ cells (% +/- S.D.) | Human T cells (% +/- S.D.) | HIV-1 positive mice | Week 1      | Week 2      | Week 3      | Week 6      | Week 12     | VRC01        | % of Protection |
|------|--------------------------------|----------------------------|---------------------|-------------|-------------|-------------|-------------|-------------|--------------|-----------------|
| 1    | 66.2 +/- 0.3                   | 79.2 +/- 1                 | N                   | 0           | 0           | 0           | 0           | 0           | 1 mg/mL      | 100%            |
| 2    | 69.9 +/- 0.5                   | 81.2 +/- 0.9               | N                   | 0           | 0           | 0           | 0           | 0           |              |                 |
| 3    | 70.3 +/- 0.5                   | 77.3 +/- 1.1               | N                   | 0           | 0           | 0           | 0           | 0           |              |                 |
| 4    | 69.2 +/- 0.4                   | 77.9 +/- 0.7               | N                   | 0           | 0           | 0           | 0           | 0           |              |                 |
| 5    | 66.9 +/- 0.5                   | 78.6 +/- 1.2               | N                   | 0           | 0           | 0           | 0           | 0           |              |                 |
| 6    | 67.5 +/- 0.5                   | 77.6 +/- 0.8               | N                   | 0           | 0           | 0           | 0           | 0           |              |                 |
| 7    | 70.1 +/- 0.4                   | 80.1 +/- 0.7               | N                   | 0           | 0           | 0           | 0           | 0           |              |                 |
| 8    | 66.9 +/- 0.5                   | 81.5 +/- 1.1               | N                   | 0           | 0           | 0           | 0           | 0           |              |                 |
| Mice | Human CD45+ cells (% +/- S.D.) | Human T cells (% +/- S.D.) | HIV-1 positive mice | Week 1      | Week 2      | Week 3      | Week 6      | Week 12     | VRC01        | % of Protection |
| 1    | 69.5 +/- 0.8                   | 76.9 +/- 1.2               | N                   | 0           | 0           | 0           | 0           | 0           | 0.5 mg/mL    | 100%            |
| 2    | 67.9 +/- 0.7                   | 78.2 +/- 0.8               | N                   | 0           | 0           | 0           | 0           | 0           |              |                 |
| 3    | 66.4 +/- 0.8                   | 80.1 +/- 1.1               | N                   | 0           | 0           | 0           | 0           | 0           |              |                 |
| 4    | 70.1 +/- 0.5                   | 78.6 +/- 1.3               | N                   | 0           | 0           | 0           | 0           | 0           |              |                 |
| 5    | 69.5 +/- 0.6                   | 79.7 +/- 1.4               | N                   | 0           | 0           | 0           | 0           | 0           |              |                 |
| 6    | 69.3 +/- 0.7                   | 79.4 +/- 1.3               | N                   | 0           | 0           | 0           | 0           | 0           |              |                 |
| 7    | 65.6 +/- 0.5                   | 80.5 +/- 1.5               | N                   | 0           | 0           | 0           | 0           | 0           |              |                 |
| 8    | 69.1 +/- 0.7                   | 78.7 +/- 1                 | N                   | 0           | 0           | 0           | 0           | 0           |              |                 |
| Mice | Human CD45+ cells (% +/- S.D.) | Human T cells (% +/- S.D.) | HIV-1 positive mice | Week 1      | Week 2      | Week 3      | Week 6      | Week 12     | VRC01        | % of Protection |
| 1    | 68.8 +/- 1.1                   | 76.7 +/- 1.4               | N                   | 0           | 0           | 0           | 0           | 0           | 0.25 mg/mL   | 50%             |
| 2    | 66.8 +/- 0.9                   | 78.4 +/- 1.2               | N                   | 0           | 0           | 0           | 0           | 0           |              |                 |
| 3    | 70 +/- 1                       | 75.6 +/- 1.5               | Y                   | 0.9 +/- 0.2 | 1.1 +/- 0.2 | 1.2 +/- 0.3 | 1.9 +/- 0.4 | 1.8 +/- 0.3 |              |                 |
| 4    | 69.2 +/- 0.9                   | 80.2 +/- 1.3               | N                   | 0           | 0           | 0           | 0           | 0           |              |                 |
| 5    | 67.5 +/- 0.7                   | 79.1 +/- 1.1               | Y                   | 0.7 +/- 0.2 | 1 +/- 0.3   | 1.3 +/- 0.4 | 2.1 +/- 0.8 | 1.9 +/- 0.7 |              |                 |
| 6    | 64.9 +/- 0.9                   | 77.8 +/- 1.3               | Y                   | 0.9 +/- 0.3 | 1.2 +/- 0.3 | 1.4 +/- 0.6 | 1.8 +/- 0.5 | 2 +/- 0.6   |              |                 |
| 7    | 70.1 +/- 1.2                   | 79.3 +/- 1.4               | Y                   | 0.8 +/- 0.4 | 1.1 +/- 0.2 | 1.5 +/- 0.4 | 2 +/- 0.6   | 1.8 +/- 0.2 |              |                 |
| 8    | 68.7 +/- 0.9                   | 77.2 +/- 1.1               | N                   | 0           | 0           | 0           | 0           | 0           |              |                 |
| Mice | Human CD45+ cells (% +/- S.D.) | Human T cells (% +/- S.D.) | HIV-1 positive mice | Week 1      | Week 2      | Week 3      | Week 6      | Week 12     | VRC01        | % of Protection |
| 1    | 69.1 +/- 1.1                   | 77.3 +/- 1.1               | Y                   | 0.8 +/- 0.2 | 1.2 +/- 0.3 | 1.4 +/- 0.3 | 1.7 +/- 0.3 | 1.9 +/- 0.4 | 0.125 mg/mL  | 13%             |
| 2    | 66.8 +/- 0.7                   | 76.8 +/- 1.3               | Y                   | 1 +/- 0.3   | 1.3 +/- 0.4 | 1.5 +/- 0.4 | 1.9 +/- 0.4 | 1.8 +/- 0.2 |              |                 |
| 3    | 70.1 +/- 0.6                   | 78.2 +/- 1.5               | Y                   | 0.7 +/- 0.2 | 0.9 +/- 0.2 | 1.2 +/- 0.2 | 1.7 +/- 0.2 | 1.9 +/- 0.4 |              |                 |
| 4    | 67.4 +/- 0.8                   | 80.1 +/- 1.2               | Y                   | 0.9 +/- 0.2 | 1.1 +/- 0.3 | 1.3 +/- 0.4 | 2.1 +/- 0.4 | 1.9 +/- 0.3 |              |                 |
| 5    | 65.7 +/- 0.6                   | 76.4 +/- 0.7               | Y                   | 0.8 +/- 0.1 | 1 +/- 0.2   | 1.2 +/- 0.3 | 1.9 +/- 0.3 | 1.9 +/- 0.5 |              |                 |
| 6    | 68.3 +/- 0.3                   | 79.3 +/- 1.3               | N                   | 0           | 0           | 0           | 0           | 0           |              |                 |
| 7    | 67.6 +/- 0.4                   | 78.4 +/- 0.7               | Y                   | 0.9 +/- 0.3 | 1.2 +/- 0.2 | 1.4 +/- 0.1 | 2.2 +/- 0.4 | 2 +/- 0.3   |              |                 |
| 8    | 70.1 +/- 0.5                   | 77.1 +/- 1.4               | Y                   | 0.8 +/- 0.2 | 1 +/- 0.3   | 1.2 +/- 0.3 | 1.8 +/- 0.3 | 1.9 +/- 0.4 |              |                 |
| Mice | Human CD45+ cells (% +/- S.D.) | Human T cells (% +/- S.D.) | HIV-1 positive mice | Week 1      | Week 2      | Week 3      | Week 6      | Week 12     | VRC01        | % of Protection |
| 1    | 68.2 +/- 1.0                   | 76.9 +/- 1.3               | Y                   | 0.6 +/- 0.2 | 0.8 +/- 0.2 | 1.2 +/- 0.3 | 1.6 +/- 0.3 | 1.9 +/- 0.4 | 0.0625 mg/mL | 0%              |
| 2    | 66.9 +/- 0.7                   | 78.1 +/- 1.1               | Y                   | 0.9 +/- 0.3 | 1.1 +/- 0.1 | 1.4 +/- 0.4 | 1.8 +/- 0.4 | 2.0 +/- 0.3 |              |                 |
| 3    | 70.3 +/- 0.4                   | 75.4 +/- 1.2               | Y                   | 1.0 +/- 0.2 | 1.2 +/- 0.3 | 1.5 +/- 0.2 | 1.9 +/- 0.3 | 2.2 +/- 0.4 |              |                 |
| 4    | 67.7 +/- 1.2                   | 78.2 +/- 1.1               | Y                   | 0.8 +/- 0.2 | 1.0 +/- 0.2 | 1.3 +/- 0.2 | 1.7 +/- 0.2 | 1.9 +/- 0.3 |              |                 |
| 5    | 65.7 +/- 0.6                   | 81.2 +/- 0.9               | Y                   | 0.9 +/- 0.2 | 1.2 +/- 0.2 | 1.4 +/- 0.4 | 2.1 +/- 0.4 | 1.8 +/- 0.4 |              |                 |
| 6    | 67.1 +/- 0.5                   | 77.6 +/- 1.2               | Y                   | 0.7 +/- 0.1 | 0.9 +/- 0.2 | 1.2 +/- 0.3 | 1.7 +/- 0.3 | 1.8 +/- 0.3 |              |                 |
| 7    | 68.7 +/- 0.4                   | 78.1 +/- 0.7               | Y                   | 1.1 +/- 0.3 | 1.3 +/- 0.3 | 1.5 +/- 0.4 | 1.9 +/- 0.2 | 2.1 +/- 0.4 |              |                 |
| 8    | 70.5 +/- 0.6                   | 76.1 +/- 1.1               | Y                   | 0.8 +/- 0.1 | 1.1 +/- 0.2 | 1.3 +/- 0.3 | 2.0 +/- 0.4 | 1.9 +/- 0.3 |              |                 |

Plasma viral RNA (10<sup>5</sup> copies/mL)

**NOTE: VRC01-N active makes up 50% of the mass indicated above; the remainder consists of excipients**

**Appendix B:** BLT mouse efficacy data from HIV vaginal challenge studies following vaginal administration of VRC01-N, TDF, FTC (broad dosing range).

| Mice | Human CD45+ cells (% +/- S.D.) | Human T cells (% +/- S.D.) | HIV-1 positive mice | Week 1      | Week 2      | Week 3      | Week 6      | Week 12     | TDF/FTC/VRC01                                 | % of Protection |
|------|--------------------------------|----------------------------|---------------------|-------------|-------------|-------------|-------------|-------------|-----------------------------------------------|-----------------|
| 1    | 70.2 +/- 0.3                   | 75.5 +/- 1.0               | N                   | 0           | 0           | 0           | 0           | 0           | 1 µM TDF + 0.0625 µM FTC + 0.0625 mg/mL VRC01 | 20%             |
| 2    | 68.5 +/- 0.4                   | 78.4 +/- 0.8               | Y                   | 0.8 +/- 0.1 | 1.2 +/- 0.4 | 1.5 +/- 0.3 | 1.9 +/- 0.3 | 1.9 +/- 0.2 |                                               |                 |
| 3    | 69.1 +/- 0.3                   | 75.9 +/- 0.6               | Y                   | 0.7 +/- 0.2 | 1.1 +/- 0.2 | 1.4 +/- 0.2 | 2.0 +/- 0.2 | 2.1 +/- 0.3 |                                               |                 |
| 4    | 68.4 +/- 0.5                   | 75.6 +/- 0.9               | Y                   | 0.5 +/- 0.1 | 0.9 +/- 0.1 | 1.6 +/- 0.3 | 2.2 +/- 0.4 | 2.1 +/- 0.1 |                                               |                 |
| 5    | 71.2 +/- 0.6                   | 77.5 +/- 1.2               | Y                   | 0.6 +/- 0.2 | 0.9 +/- 0.2 | 1.4 +/- 0.2 | 2.1 +/- 0.5 | 1.9 +/- 0.4 |                                               |                 |
| 6    | 67.9 +/- 0.5                   | 78.9 +/- 0.9               | Y                   | 0.9 +/- 0.2 | 1.2 +/- 0.2 | 1.3 +/- 0.4 | 1.9 +/- 0.2 | 2.0 +/- 0.2 |                                               |                 |
| 7    | 70.2 +/- 0.6                   | 75.7 +/- 0.7               | Y                   | 0.7 +/- 0.1 | 1.1 +/- 0.1 | 1.6 +/- 0.3 | 2.1 +/- 0.3 | 1.9 +/- 0.3 |                                               |                 |
| 8    | 67.8 +/- 0.3                   | 77.3 +/- 1.1               | Y                   | 0.6 +/- 0.2 | 0.9 +/- 0.2 | 1.4 +/- 0.1 | 1.9 +/- 0.2 | 2.0 +/- 0.3 |                                               |                 |
| 9    | 69.3 +/- 0.6                   | 76.8 +/- 0.7               | N                   | 0           | 0           | 0           | 0           | 0           |                                               |                 |
| 10   | 65.8 +/- 0.3                   | 78.5 +/- 0.9               | Y                   | 0.8 +/- 0.2 | 1.3 +/- 0.2 | 1.6 +/- 0.2 | 2.2 +/- 0.3 | 2.1 +/- 0.2 |                                               |                 |
| Mice | Human CD45+ cells (% +/- S.D.) | Human T cells (% +/- S.D.) | HIV-1 positive mice | Week 1      | Week 2      | Week 3      | Week 6      | Week 12     | 2 µM TDF + 0.125 µM FTC + 0.125 mg/mL VRC01   | 100%            |
| 1    | 71.2 +/- 0.4                   | 76.6 +/- 1.2               | N                   | 0           | 0           | 0           | 0           | 0           |                                               |                 |
| 2    | 69.5 +/- 0.7                   | 74.9 +/- 0.8               | N                   | 0           | 0           | 0           | 0           | 0           |                                               |                 |
| 3    | 67.9 +/- 0.5                   | 78.2 +/- 1.1               | N                   | 0           | 0           | 0           | 0           | 0           |                                               |                 |
| 4    | 70.1 +/- 0.7                   | 78.8 +/- 0.7               | N                   | 0           | 0           | 0           | 0           | 0           |                                               |                 |
| 5    | 68.5 +/- 0.5                   | 76.4 +/- 1.1               | N                   | 0           | 0           | 0           | 0           | 0           |                                               |                 |
| 6    | 66.9 +/- 0.7                   | 77.4 +/- 1.2               | N                   | 0           | 0           | 0           | 0           | 0           |                                               |                 |
| 7    | 69.9 +/- 0.4                   | 77.3 +/- 1.1               | N                   | 0           | 0           | 0           | 0           | 0           |                                               |                 |
| 8    | 68.5 +/- 0.6                   | 75.8 +/- 0.6               | N                   | 0           | 0           | 0           | 0           | 0           |                                               |                 |
| 9    | 69.8 +/- 0.6                   | 81.2 +/- 1.2               | N                   | 0           | 0           | 0           | 0           | 0           |                                               |                 |
| 10   | 68.4 +/- 0.5                   | 78.3 +/- 0.9               | N                   | 0           | 0           | 0           | 0           | 0           |                                               |                 |
| Mice | Human CD45+ cells (% +/- S.D.) | Human T cells (% +/- S.D.) | HIV-1 positive mice | Week 1      | Week 2      | Week 3      | Week 6      | Week 12     | 4 µM TDF + 0.25 µM FTC + 0.25 mg/mL VRC01     | 100%            |
| 1    | 69.3 +/- 0.6                   | 77.5 +/- 1.2               | N                   | 0           | 0           | 0           | 0           | 0           |                                               |                 |
| 2    | 67.6 +/- 0.9                   | 78.5 +/- 1.2               | N                   | 0           | 0           | 0           | 0           | 0           |                                               |                 |
| 3    | 70.1 +/- 0.5                   | 74.5 +/- 0.8               | N                   | 0           | 0           | 0           | 0           | 0           |                                               |                 |
| 4    | 69.1 +/- 0.8                   | 73.8 +/- 0.6               | N                   | 0           | 0           | 0           | 0           | 0           |                                               |                 |
| 5    | 65.4 +/- 1.1                   | 77.2 +/- 0.9               | N                   | 0           | 0           | 0           | 0           | 0           |                                               |                 |
| 6    | 68.6 +/- 0.5                   | 81.3 +/- 1.3               | N                   | 0           | 0           | 0           | 0           | 0           |                                               |                 |
| 7    | 65.6 +/- 0.8                   | 79.4 +/- 0.8               | N                   | 0           | 0           | 0           | 0           | 0           |                                               |                 |
| 8    | 68.5 +/- 0.7                   | 77.2 +/- 1.1               | N                   | 0           | 0           | 0           | 0           | 0           |                                               |                 |
| 9    | 71.2 +/- 0.6                   | 75.6 +/- 1.2               | N                   | 0           | 0           | 0           | 0           | 0           |                                               |                 |
| 10   | 66.5 +/- 0.7                   | 77.4 +/- 1.0               | N                   | 0           | 0           | 0           | 0           | 0           |                                               |                 |
| Mice | Human CD45+ cells (% +/- S.D.) | Human T cells (% +/- S.D.) | HIV-1 positive mice | Week 1      | Week 2      | Week 3      | Week 6      | Week 12     | 8 µM TDF + 0.5 µM FTC + 0.5 mg/mL VRC01       | 100%            |
| 1    | 69.3 +/- 0.9                   | 76.5 +/- 1.1               | N                   | 0           | 0           | 0           | 0           | 0           |                                               |                 |
| 2    | 65.8 +/- 0.6                   | 74.9 +/- 1.2               | N                   | 0           | 0           | 0           | 0           | 0           |                                               |                 |
| 3    | 70.1 +/- 1.1                   | 75.5 +/- 0.9               | N                   | 0           | 0           | 0           | 0           | 0           |                                               |                 |
| 4    | 66.8 +/- 0.8                   | 77.6 +/- 1.1               | N                   | 0           | 0           | 0           | 0           | 0           |                                               |                 |
| 5    | 66.4 +/- 0.5                   | 79.2 +/- 0.9               | N                   | 0           | 0           | 0           | 0           | 0           |                                               |                 |
| 6    | 68.3 +/- 0.9                   | 81.0 +/- 1.3               | N                   | 0           | 0           | 0           | 0           | 0           |                                               |                 |
| 7    | 66.5 +/- 0.6                   | 76.5 +/- 0.7               | N                   | 0           | 0           | 0           | 0           | 0           |                                               |                 |
| 8    | 71.2 +/- 0.7                   | 79.2 +/- 1.1               | N                   | 0           | 0           | 0           | 0           | 0           |                                               |                 |
| 9    | 69.1 +/- 1.2                   | 75.6 +/- 1.3               | N                   | 0           | 0           | 0           | 0           | 0           |                                               |                 |
| 10   | 66.4 +/- 0.9                   | 77.5 +/- 1.2               | N                   | 0           | 0           | 0           | 0           | 0           |                                               |                 |
| Mice | Human CD45+ cells (% +/- S.D.) | Human T cells (% +/- S.D.) | HIV-1 positive mice | Week 1      | Week 2      | Week 3      | Week 6      | Week 12     | 16 µM TDF + 1 µM FTC + 1 mg/mL VRC01          | 100%            |
| 1    | 69.2 +/- 1.0                   | 76.1 +/- 1.1               | N                   | 0           | 0           | 0           | 0           | 0           |                                               |                 |
| 2    | 66.5 +/- 0.8                   | 74.1 +/- 1.2               | N                   | 0           | 0           | 0           | 0           | 0           |                                               |                 |
| 3    | 68.4 +/- 0.6                   | 75.4 +/- 1.1               | N                   | 0           | 0           | 0           | 0           | 0           |                                               |                 |
| 4    | 67.3 +/- 0.8                   | 78.5 +/- 1.3               | N                   | 0           | 0           | 0           | 0           | 0           |                                               |                 |
| 5    | 67.4 +/- 0.9                   | 74.7 +/- 0.9               | N                   | 0           | 0           | 0           | 0           | 0           |                                               |                 |
| 6    | 69.4 +/- 0.5                   | 79.3 +/- 1.2               | N                   | 0           | 0           | 0           | 0           | 0           |                                               |                 |
| 7    | 66.4 +/- 0.8                   | 75.4 +/- 0.8               | N                   | 0           | 0           | 0           | 0           | 0           |                                               |                 |
| 8    | 65.6 +/- 0.6                   | 75.4 +/- 1.1               | N                   | 0           | 0           | 0           | 0           | 0           |                                               |                 |
| 9    | 69.4 +/- 0.9                   | 76.3 +/- 1.3               | N                   | 0           | 0           | 0           | 0           | 0           |                                               |                 |
| 10   | 66.5 +/- 0.7                   | 75.9 +/- 1.2               | N                   | 0           | 0           | 0           | 0           | 0           |                                               |                 |

Plasma viral RNA (10<sup>5</sup> copies/mL)

**NOTE:** VRC01-N active makes up 50% of the mass indicated above; the remainder consists of excipients

**Appendix C: BLT mouse efficacy data from HIV vaginal challenge studies following vaginal administration of VRC01-N, TDF, FTC (narrow dosing range).**

| Mice | Human CD45+ cells (% +/- S.D.) | Human T cells (% +/- S.D.) | HIV-1 positive mice | Week 1      | Week 2      | Week 3      | Week 6      | Week 12     | % of Protection                                  |
|------|--------------------------------|----------------------------|---------------------|-------------|-------------|-------------|-------------|-------------|--------------------------------------------------|
| 1    | 68.4 +/- 0.6                   | 73.8 +/- 2.4               | N                   | 0           | 0           | 0           | 0           | 0           | 2 µM TDF + 0.125 µM FTC + 0.125 mg/mL VRC01      |
| 2    | 69.9 +/- 0.4                   | 71.1 +/- 1.7               | N                   | 0           | 0           | 0           | 0           | 0           |                                                  |
| 3    | 70.1 +/- 0.8                   | 75.5 +/- 2                 | N                   | 0           | 0           | 0           | 0           | 0           |                                                  |
| 4    | 67.6 +/- 1.2                   | 76.1 +/- 1.5               | N                   | 0           | 0           | 0           | 0           | 0           |                                                  |
| 5    | 69.6 +/- 0.9                   | 73.8 +/- 2.4               | N                   | 0           | 0           | 0           | 0           | 0           |                                                  |
| 6    | 65.8 +/- 1.1                   | 75.2 +/- 2.2               | N                   | 0           | 0           | 0           | 0           | 0           |                                                  |
| 7    | 69.3 +/- 0.7                   | 76.1 +/- 1.5               | N                   | 0           | 0           | 0           | 0           | 0           |                                                  |
| 8    | 66.4 +/- 1                     | 73.7 +/- 1.9               | N                   | 0           | 0           | 0           | 0           | 0           |                                                  |
| 9    | 69.2 +/- 1.2                   | 76.1 +/- 2.3               | N                   | 0           | 0           | 0           | 0           | 0           |                                                  |
| 10   | 65.6 +/- 1.4                   | 74.9 +/- 1.7               | N                   | 0           | 0           | 0           | 0           | 0           |                                                  |
| Mice | Human CD45+ cells (% +/- S.D.) | Human T cells (% +/- S.D.) | HIV-1 positive mice | Week 1      | Week 2      | Week 3      | Week 6      | Week 12     | % of Protection                                  |
| 1    | 66.4 +/- 1.3                   | 73.5 +/- 2.3               | N                   | 0           | 0           | 0           | 0           | 0           | 1.75 µM TDF + 0.1094 µM FTC + 0.109 mg/mL VRC01  |
| 2    | 63.8 +/- 2.4                   | 76.1 +/- 1.8               | N                   | 0           | 0           | 0           | 0           | 0           |                                                  |
| 3    | 65.1 +/- 1.8                   | 72.6 +/- 2.5               | Y                   | 0.7 +/- 0.2 | 1.2 +/- 0.3 | 1.5 +/- 0.2 | 2.1 +/- 0.3 | 2.2 +/- 0.3 |                                                  |
| 4    | 65.7 +/- 1.5                   | 74.2 +/- 1.9               | N                   | 0           | 0           | 0           | 0           | 0           |                                                  |
| 5    | 64.6 +/- 2.2                   | 73.8 +/- 1.6               | N                   | 0           | 0           | 0           | 0           | 0           |                                                  |
| 6    | 63.8 +/- 1.9                   | 77.2 +/- 2.1               | N                   | 0           | 0           | 0           | 0           | 0           |                                                  |
| 7    | 64.6 +/- 1.3                   | 74.2 +/- 1.6               | N                   | 0           | 0           | 0           | 0           | 0           |                                                  |
| 8    | 66.7 +/- 1.3                   | 76.2 +/- 2.2               | N                   | 0           | 0           | 0           | 0           | 0           |                                                  |
| 9    | 66.8 +/- 2.1                   | 74.6 +/- 1.8               | N                   | 0           | 0           | 0           | 0           | 0           |                                                  |
| 10   | 63.7 +/- 2.2                   | 73.7 +/- 2                 | N                   | 0           | 0           | 0           | 0           | 0           |                                                  |
| Mice | Human CD45+ cells (% +/- S.D.) | Human T cells (% +/- S.D.) | HIV-1 positive mice | Week 1      | Week 2      | Week 3      | Week 6      | Week 12     | % of Protection                                  |
| 1    | 65.2 +/- 1.1                   | 74.2 +/- 1.5               | N                   | 0           | 0           | 0           | 0           | 0           | 1.5 µM TDF + 0.0938 µM FTC + 0.0938 mg/mL VRC01  |
| 2    | 62.9 +/- 1.4                   | 77.1 +/- 2.1               | N                   | 0           | 0           | 0           | 0           | 0           |                                                  |
| 3    | 63.6 +/- 1.5                   | 73.7 +/- 2.3               | Y                   | 0.6 +/- 0.1 | 1.1 +/- 0.2 | 1.6 +/- 0.4 | 2.3 +/- 0.2 | 2.4 +/- 0.2 |                                                  |
| 4    | 66.1 +/- 2.1                   | 77.1 +/- 2.4               | N                   | 0           | 0           | 0           | 0           | 0           |                                                  |
| 5    | 62.9 +/- 1.6                   | 75.2 +/- 1.8               | N                   | 0           | 0           | 0           | 0           | 0           |                                                  |
| 6    | 64.4 +/- 2                     | 75.3 +/- 1.6               | Y                   | 0.7 +/- 0.2 | 1.3 +/- 0.3 | 1.8 +/- 0.3 | 2.2 +/- 0.3 | 2.3 +/- 0.4 |                                                  |
| 7    | 65.2 +/- 1.7                   | 75.1 +/- 2.2               | N                   | 0           | 0           | 0           | 0           | 0           |                                                  |
| 8    | 68.3 +/- 1.3                   | 77.4 +/- 1.8               | Y                   | 0.9 +/- 0.3 | 1.4 +/- 0.2 | 1.8 +/- 0.4 | 2.4 +/- 0.4 | 2.2 +/- 0.3 |                                                  |
| 9    | 63.1 +/- 1.5                   | 75.5 +/- 2.4               | N                   | 0           | 0           | 0           | 0           | 0           |                                                  |
| 10   | 65.4 +/- 1.9                   | 73.7 +/- 1.9               | N                   | 0           | 0           | 0           | 0           | 0           |                                                  |
| Mice | Human CD45+ cells (% +/- S.D.) | Human T cells (% +/- S.D.) | HIV-1 positive mice | Week 1      | Week 2      | Week 3      | Week 6      | Week 12     | % of Protection                                  |
| 1    | 64.4 +/- 2.2                   | 73.4 +/- 2.2               | Y                   | 0.6 +/- 0.2 | 1.0 +/- 0.2 | 1.4 +/- 0.3 | 2.1 +/- 0.4 | 2.3 +/- 0.3 | 1.25 µM TDF + 0.0781 µM FTC + 0.0781 mg/mL VRC01 |
| 2    | 62.9 +/- 1.6                   | 71.3 +/- 1.6               | N                   | 0           | 0           | 0           | 0           | 0           |                                                  |
| 3    | 64.6 +/- 2.1                   | 73.3 +/- 1.8               | N                   | 0           | 0           | 0           | 0           | 0           |                                                  |
| 4    | 66.2 +/- 1.5                   | 74.2 +/- 1.3               | Y                   | 0.7 +/- 0.1 | 1.3 +/- 0.3 | 1.7 +/- 0.3 | 2.4 +/- 0.2 | 2.2 +/- 0.4 |                                                  |
| 5    | 65.1 +/- 1.8                   | 71.8 +/- 1.5               | Y                   | 0.5 +/- 0.1 | 1.2 +/- 0.2 | 1.5 +/- 0.2 | 2.3 +/- 0.1 | 2.4 +/- 0.3 |                                                  |
| 6    | 63.3 +/- 1.5                   | 75.7 +/- 2.1               | Y                   | 0.4 +/- 0.2 | 1.0 +/- 0.3 | 1.6 +/- 0.3 | 2.2 +/- 0.3 | 2.3 +/- 0.1 |                                                  |
| 7    | 66.2 +/- 2.3                   | 77.2 +/- 1.6               | N                   | 0           | 0           | 0           | 0           | 0           |                                                  |
| 8    | 65.3 +/- 1.9                   | 72.9 +/- 1.7               | Y                   | 0.6 +/- 0.1 | 1.2 +/- 0.3 | 1.7 +/- 0.4 | 2.2 +/- 0.4 | 2.6 +/- 0.2 |                                                  |
| 9    | 63.8 +/- 2.1                   | 74.2 +/- 2.1               | N                   | 0           | 0           | 0           | 0           | 0           |                                                  |
| 10   | 64.1 +/- 1.7                   | 73.7 +/- 1.9               | Y                   | 0.5 +/- 0.2 | 1.3 +/- 0.4 | 1.8 +/- 0.3 | 2.4 +/- 0.3 | 2.4 +/- 0.6 |                                                  |
| Mice | Human CD45+ cells (% +/- S.D.) | Human T cells (% +/- S.D.) | HIV-1 positive mice | Week 1      | Week 2      | Week 3      | Week 6      | Week 12     | % of Protection                                  |
| 1    | 63.1 +/- 0.6                   | 72.5 +/- 2.2               | Y                   | 0.4 +/- 0.1 | 1.2 +/- 0.3 | 1.6 +/- 0.3 | 2.2 +/- 0.4 | 2.3 +/- 0.1 | 0.5 µM TDF + 0.0313 µM FTC + 0.0313 mg/mL VRC01  |
| 2    | 64.1 +/- 1.2                   | 70.8 +/- 1.6               | Y                   | 0.5 +/- 0.2 | 0.9 +/- 0.1 | 1.4 +/- 0.2 | 1.8 +/- 0.3 | 2.2 +/- 0.3 |                                                  |
| 3    | 62.9 +/- 2.1                   | 75.5 +/- 1.1               | Y                   | 0.6 +/- 0.2 | 1.0 +/- 0.2 | 1.6 +/- 0.4 | 2.1 +/- 0.3 | 2.6 +/- 0.5 |                                                  |
| 4    | 65.2 +/- 1.7                   | 76.3 +/- 3.1               | Y                   | 0.6 +/- 0.1 | 1.3 +/- 0.2 | 1.5 +/- 0.3 | 2.3 +/- 0.4 | 2.4 +/- 0.4 |                                                  |
| 5    | 63.2 +/- 2.3                   | 73.3 +/- 0.7               | Y                   | 0.4 +/- 0.2 | 0.9 +/- 0.2 | 1.5 +/- 0.1 | 2.0 +/- 0.3 | 2.3 +/- 0.2 |                                                  |
| 6    | 65.3 +/- 3.1                   | 75.5 +/- 1.9               | Y                   | 0.5 +/- 0.1 | 1.1 +/- 0.3 | 1.5 +/- 0.2 | 2.2 +/- 0.4 | 2.6 +/- 0.4 |                                                  |
| 7    | 64.4 +/- 2.5                   | 71.6 +/- 2.4               | Y                   | 0.5 +/- 0.2 | 1.3 +/- 0.1 | 1.7 +/- 0.3 | 2.1 +/- 0.2 | 2.3 +/- 0.4 |                                                  |
| 8    | 66.1 +/- 1.9                   | 74.8 +/- 1.6               | Y                   | 0.6 +/- 0.2 | 1.2 +/- 0.1 | 1.7 +/- 0.4 | 2.5 +/- 0.4 | 2.4 +/- 0.2 |                                                  |
| 9    | 64.4 +/- 2.2                   | 72.7 +/- 0.9               | Y                   | 0.3 +/- 0.1 | 0.9 +/- 0.2 | 1.3 +/- 0.2 | 1.9 +/- 0.3 | 2.2 +/- 0.4 |                                                  |
| 10   | 62.8 +/- 3.3                   | 71.5 +/- 1.8               | Y                   | 0.4 +/- 0.2 | 1.0 +/- 0.2 | 1.7 +/- 0.2 | 2.4 +/- 0.5 | 2.4 +/- 0.2 |                                                  |

Plasma viral RNA (10<sup>5</sup> copies/mL)

**NOTE: VRC01-N active makes up 50% of the mass indicated above; the remainder consists of excipients**

Appendix D: Median-effect data used in the analysis.

| Median-Effect Data   |              |             |                 |         |         |         |  |
|----------------------|--------------|-------------|-----------------|---------|---------|---------|--|
| VRC01-N, single drug |              |             | TDF-FTC-VRC01-N |         |         |         |  |
| Log(D) (nM)          | Efficacy (%) | log(D) (nM) | Efficacy (%)    |         | Study 1 | Study 2 |  |
|                      |              |             | Study 1         | Study 2 |         |         |  |
| 3.503                | 100          | 3.101       | 20              |         |         |         |  |
| 3.202                | 100          | 3.402       | 100             |         |         |         |  |
| 2.901                | 50           | 3.703       | 100             |         |         |         |  |
| 2.600                | 13           | 4.004       | 100             |         |         |         |  |
| 2.299                | 0            | 4.305       | 100             |         |         |         |  |
|                      |              | 2.800       |                 |         |         | 0       |  |
|                      |              | 3.198       |                 |         |         | 40      |  |
|                      |              | 3.277       |                 |         |         | 70      |  |
|                      |              | 3.344       |                 |         |         | 90      |  |
|                      |              | 3.402       |                 |         |         | 100     |  |
| Log(D) (nM)          | TDF          | FTC         | VRC01-N         | Triple  |         |         |  |
| 3.000                | -2.601       |             |                 |         |         |         |  |
| 3.301                | -0.954       |             |                 |         |         |         |  |
| 3.602                | -0.176       |             |                 |         |         |         |  |
| 4.204                | 1.996        |             |                 |         |         |         |  |
| 4.505                | 1.996        |             |                 |         |         |         |  |
| 1.398                |              | -1.591      |                 |         |         |         |  |
| 1.699                |              | -0.954      |                 |         |         |         |  |
| 2.301                |              | 0.000       |                 |         |         |         |  |
| 2.602                |              | 0.602       |                 |         |         |         |  |
| 2.778                |              | 1.996       |                 |         |         |         |  |
| 3.503                |              |             | 1.996           |         |         |         |  |
| 3.202                |              |             | 1.996           |         |         |         |  |
| 2.901                |              |             | 0.000           |         |         |         |  |
| 2.600                |              |             | -0.845          |         |         |         |  |
| 2.299                |              |             | -2.601          |         |         |         |  |
| 3.101                |              |             |                 | -0.602  |         |         |  |
| 2.800                |              |             |                 | -2.601  |         |         |  |
| 3.198                |              |             |                 | -0.176  |         |         |  |
| 3.277                |              |             |                 | 0.368   |         |         |  |
| 3.344                |              |             |                 | 0.954   |         |         |  |
| 3.402                |              |             |                 | 1.996   |         |         |  |
|                      |              |             |                 | DRI     |         |         |  |
| Fa                   | CI Study 1   | CI Study 2  | Fa              | TDF     | FTC     | VRC01-N |  |
| 0.0025               |              | 2.84        | 0.0025          | 1.47    | 0.64    | 1.68    |  |
| 0.2                  | 1.30         |             | 0.2             | 3.24    | 1.64    | 2.66    |  |
| 0.4                  |              | 1.19        | 0.4             | 3.56    | 1.85    | 2.72    |  |
| 0.7                  |              | 0.96        | 0.7             | 4.45    | 2.41    | 3.10    |  |
| 0.9                  |              | 0.74        | 0.9             | 5.90    | 3.34    | 3.73    |  |
| 0.99                 | 0.40         |             | 0.99            |         |         | 5.94    |  |
| 0.999                | 0.40         |             | 0.999           |         |         | 5.29    |  |
| 0.9999               | 0.41         |             | 0.9999          |         |         | 4.71    |  |
